# Supplementary material
Source: PubMed Central journal article supplement (PMC3731690)
Supplement: Supp_Table1.pdf [file Supp_Table1.pdf]

SUPPLEMENTARY TABLE S1. MICROSCOPIC APPEARANCE OF ALL DEFECTS, BASED ON THE HISTOLOGIC SCORING SYSTEM

| Category  | Implantation site | Implantation time (months) | Surface irregularity | Bonding to adjacent cartilage | Regenerated subchondral bone | Inflammatory cell infiltration around implant | Chondrocyte clustering | Freedom from degenerative changes in adjacent cartilage | Metachromasia | Hyalinity | Total |
|-----------|-------------------|----------------------------|----------------------|-------------------------------|------------------------------|-----------------------------------------------|------------------------|---------------------------------------------------------|---------------|-----------|-------|
| Control1  | TG                | 1                          | 0.5                  | 1                             | 0                            | 2                                             | 0                      | 2.5                                                     | 0             | 0         | 6     |
| Control2  | TG                | 1                          | 1                    | 1.5                           | 0.5                          | 1.5                                           | 0                      | 1.5                                                     | 0             | 0.5       | 6.5   |
| Control3  | TG                | 4                          | 0                    | 2                             | 1                            | 2                                             | 0                      | 2                                                       | 1             | 1         | 9     |
| Control4  | TG                | 4                          | 2                    | 2                             | 1                            | 2                                             | 0                      | 2                                                       | 2             | 2         | 13    |
| Control5  | TG                | 4                          | 1                    | 2                             | 1                            | 1.5                                           | 0                      | 2                                                       | 1             | 1         | 9.5   |
| Control6  | TG                | 4                          | 3                    | 1.5                           | 0.5                          | 2                                             | 1                      | 2                                                       | 2             | 2         | 14    |
| Control7  | TG                | 4                          | 2.5                  | 2                             | 1                            | 2                                             | 1.5                    | 2                                                       | 2             | 2         | 15    |
| Control8  | MC                | 4                          | 3                    | 2                             | 1                            | 2                                             | 2                      | 2.5                                                     | 2             | 2         | 17    |
| Control9  | MC                | 4                          | 3                    | 2                             | 1                            | 2                                             | 1.5                    | 2                                                       | 2.5           | 2         | 16.5  |
| SVF1      | MC                | 1                          | 0                    | 1                             | 0                            | 1.5                                           | 0.5                    | 2                                                       | 3             | 0.5       | 6     |
| SVF2      | MC                | 1                          | 0                    | 2                             | 0                            | 1.5                                           | 0                      | 1.5                                                     | 0             | 0         | 5     |
| SVF3      | TG                | 1                          | 1                    | 2                             | 0                            | 2                                             | 0                      | 1.5                                                     | 0.5           | 0         | 7.5   |
| SVF4      | MC                | 4                          | 0.5                  | 2                             | 1.5                          | 2                                             | 1.5                    | 2                                                       | 3             | 2         | 14.5  |
| SVF5      | MC                | 4                          | 3                    | 2                             | 2                            | 2                                             | 1.5                    | 2.5                                                     | 3             | 2.5       | 18.5  |
| SVF6      | TG                | 4                          | 3                    | 2                             | 2                            | 2                                             | 2                      | 2                                                       | 3             | 2.5       | 18.5  |
| SVF7      | TG                | 4                          | 2.5                  | 2                             | 0.5                          | 1                                             | 0                      | 2                                                       | 1             | 1         | 10    |
| SVF8      | MC                | 4                          | 2                    | 2                             | 2                            | 2                                             | 1.5                    | 1                                                       | 2             | 2.5       | 15    |
| SVF9      | MC                | 4                          | 2                    | 2                             | 1                            | 2                                             | 1                      | 2.5                                                     | 1.5           | 2         | 14    |
| SVF10     | TG                | 4                          | 3                    | 2                             | 1                            | 2                                             | 1.5                    | 2                                                       | 1             | 2         | 14.5  |
| SVF11     | TG                | 4                          | 2.5                  | 2                             | 1                            | 2                                             | 1.5                    | 2                                                       | 2             | 2         | 15    |
| ASC1      | TG                | 1                          | 0                    | 1                             | 0                            | 2                                             | 0                      | 2                                                       | 0             | 0         | 5     |
| ASC2      | MC                | 1                          | 1.75                 | 2                             | 0                            | 2                                             | 1                      | 2.75                                                    | 2.25          | 2.5       | 14.25 |
| ASC3      | MC                | 1                          | 1.5                  | 1.5                           | 0                            | 1.5                                           | 0.5                    | 2                                                       | 0.75          | 1         | 10.75 |
| ASC4      | TG                | 4                          | 2                    | 2                             | 0                            | 2                                             | 0                      | 1                                                       | 1             | 1         | 9     |
| ASC5      | MC                | 4                          | 0                    | 2                             | 0                            | 2                                             | 0                      | 2                                                       | 1.5           | 1         | 8.5   |
| ASC6      | MC                | 4                          | 3                    | 2                             | 1                            | 2                                             | 1                      | 2                                                       | 3             | 2.5       | 16.5  |
| ASC7      | MC                | 4                          | 1.5                  | 2                             | 0.5                          | 1                                             | 0                      | 2                                                       | 0.5           | 1         | 8.5   |
| ASC8      | MC                | 4                          | 1.5                  | 2                             | 1                            | 1                                             | 0                      | 2                                                       | 1             | 1         | 9.5   |
| ASC9      | TG                | 4                          | 3                    | 2                             | 0                            | 2                                             | 1.5                    | 2                                                       | 2             | 2         | 13.5  |
| ASC10     | MC                | 4                          | 1.5                  | 2                             | 2                            | 2                                             | 1.5                    | 3                                                       | 1.5           | 1.5       | 15    |
| ASC11     | MC                | 4                          | 2                    | 2                             | 1                            | 1                                             | 1                      | 2                                                       | 1.5           | 2         | 12.5  |
| ASC12     | TG                | 4                          | 2                    | 2                             | 2                            | 2                                             | 1                      | 2                                                       | 1             | 2         | 14    |
| Max score |                   |                            | 3                    | 2                             | 2                            | 2                                             | 2                      | 3                                                       | 3             | 4         | 21    |

MC, medial condyle; TG, trochlear groove.
