# Supplementary material
Source: PubMed Central journal article supplement (PMC3731690)
Supplement: Supp_Table2.pdf [file Supp_Table2.pdf]

SUPPLEMENTARY TABLE S2. MICROCT DATA ON BONE AND CARTILAGE REGENERATION OF IMPLANTED CONSTRUCTS

| <i>Characteristics</i>       | <i>Native MC</i><br>(n=12) | <i>Native TG</i><br>(n=12) | <i>Acellular</i><br>(n=7) |                    | <i>SVF</i><br>(n=8) |                    | <i>ASC</i><br>(n=9) |                    |
|------------------------------|----------------------------|----------------------------|---------------------------|--------------------|---------------------|--------------------|---------------------|--------------------|
|                              | <i>Raw</i>                 | <i>Raw</i>                 | <i>Raw</i>                | <i>% of native</i> | <i>Raw</i>          | <i>% of native</i> | <i>Raw</i>          | <i>% of native</i> |
| Chondrogenesis               |                            |                            |                           |                    |                     |                    |                     |                    |
| Attenuation                  | 1.23±0.31                  | 1.45±0.39                  | 1.33±0.5                  | 113.0±28.6         | 1.42±0.3            | 95.3±22.9          | 1.28±0.29           | 104.0±26.4         |
| Osteogenesis                 |                            |                            |                           |                    |                     |                    |                     |                    |
| BV/TV (%)                    | 59.3±11.9                  | 52.7±15.5                  | 32.6±12.7                 | 62.9±21.1          | 37.7±17.4           | 65.2±28.3          | 35.1±7.5            | 63.2±22.4          |
| DMB (mg HA/cm <sup>3</sup> ) | 767.4±54.2                 | 778.1±29.3                 | 690±44.5                  | 91.2±6.4           | 719±54.5            | 91.1±3.0           | 703±32.2            | 92.2±4.4           |

All data are depicted as mean ±SD. % of native data of each sample of all groups are corrected to adjoining implantation site.  
 BV/TV, bone volume/total volume; HA, hydroxyapatite; MC, medial condyle; TG, trochlear groove.
